# Supplementary material for: Impact of Mucin on Drug Diffusion: Development of a Straightforward In Vitro Method for the Determination of Drug Diffusivity in the Presence of Mucin
Source: Pharmaceutics. 2020 Feb 17;12(2):168. doi: 10.3390/pharmaceutics12020168 (PMC7076515; doi:10.3390/pharmaceutics12020168)
Supplement: Supplementary file 1 [file pharmaceutics-12-00168-s001.pdf]

# Supplementary Materials: Impact of Mucin on Drug Diffusion: Development of a Straightforward in Vitro Method for the Determination of Drug Diffusivity in the Presence of Mucin

Margherita Falavigna, Paul C. Stein, Gøril Eide Flaten and Massimiliano Pio di Cagno

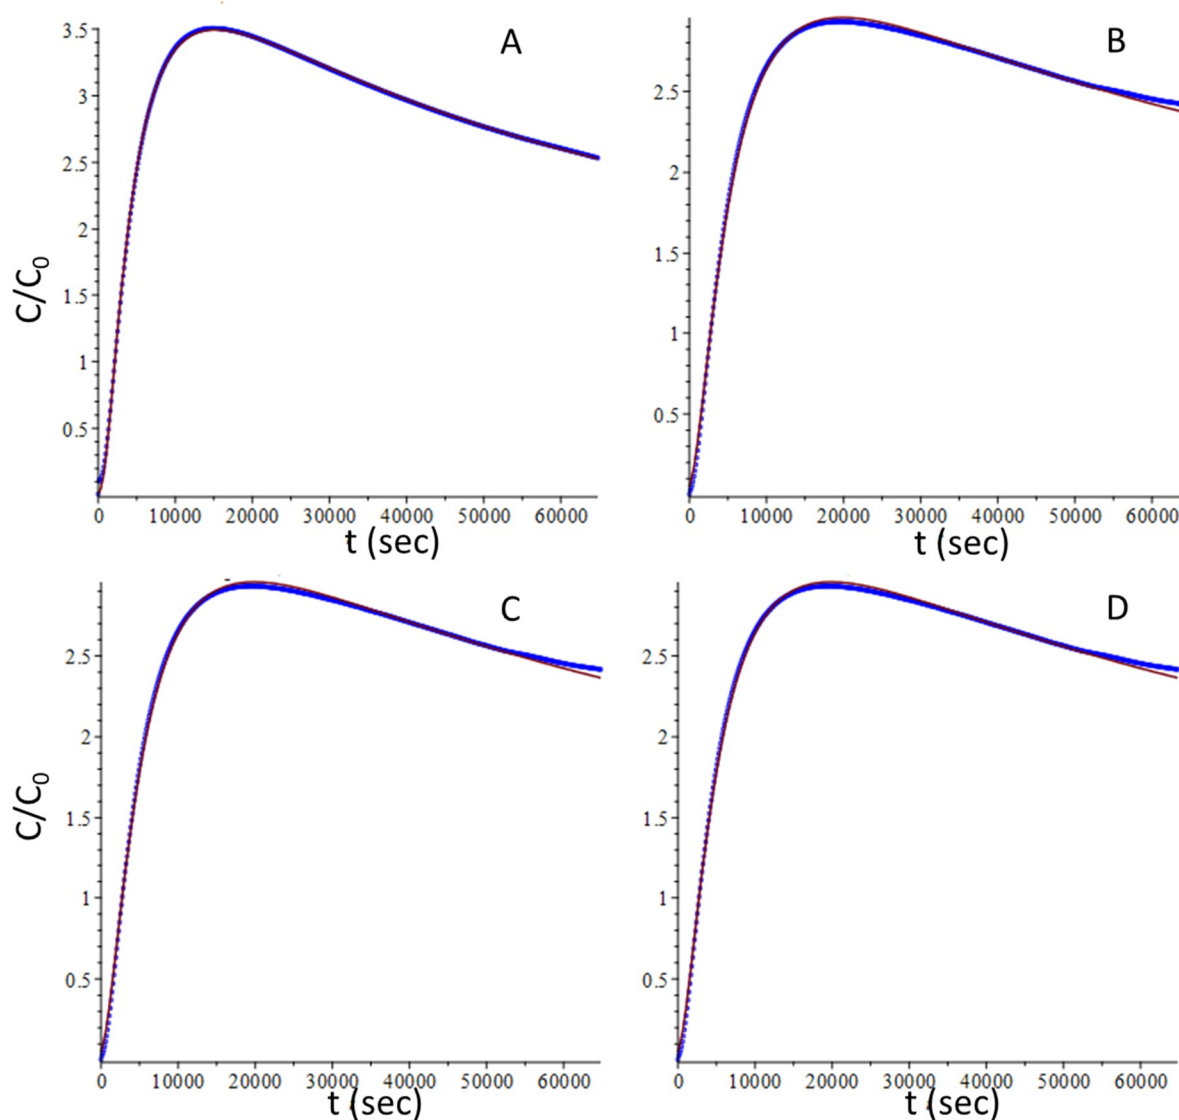

**Figure S1.** Diffusion profiles of naproxen (NPR) in water (A), MUC 0.1 (B), 0.3 (C) and 0.6% (D) (w/w). In this figure the drug concentration (C) has been normalized over the nominal concentration of the drug in the cuvette at the beginning of the experiment ( $C_0$ ).

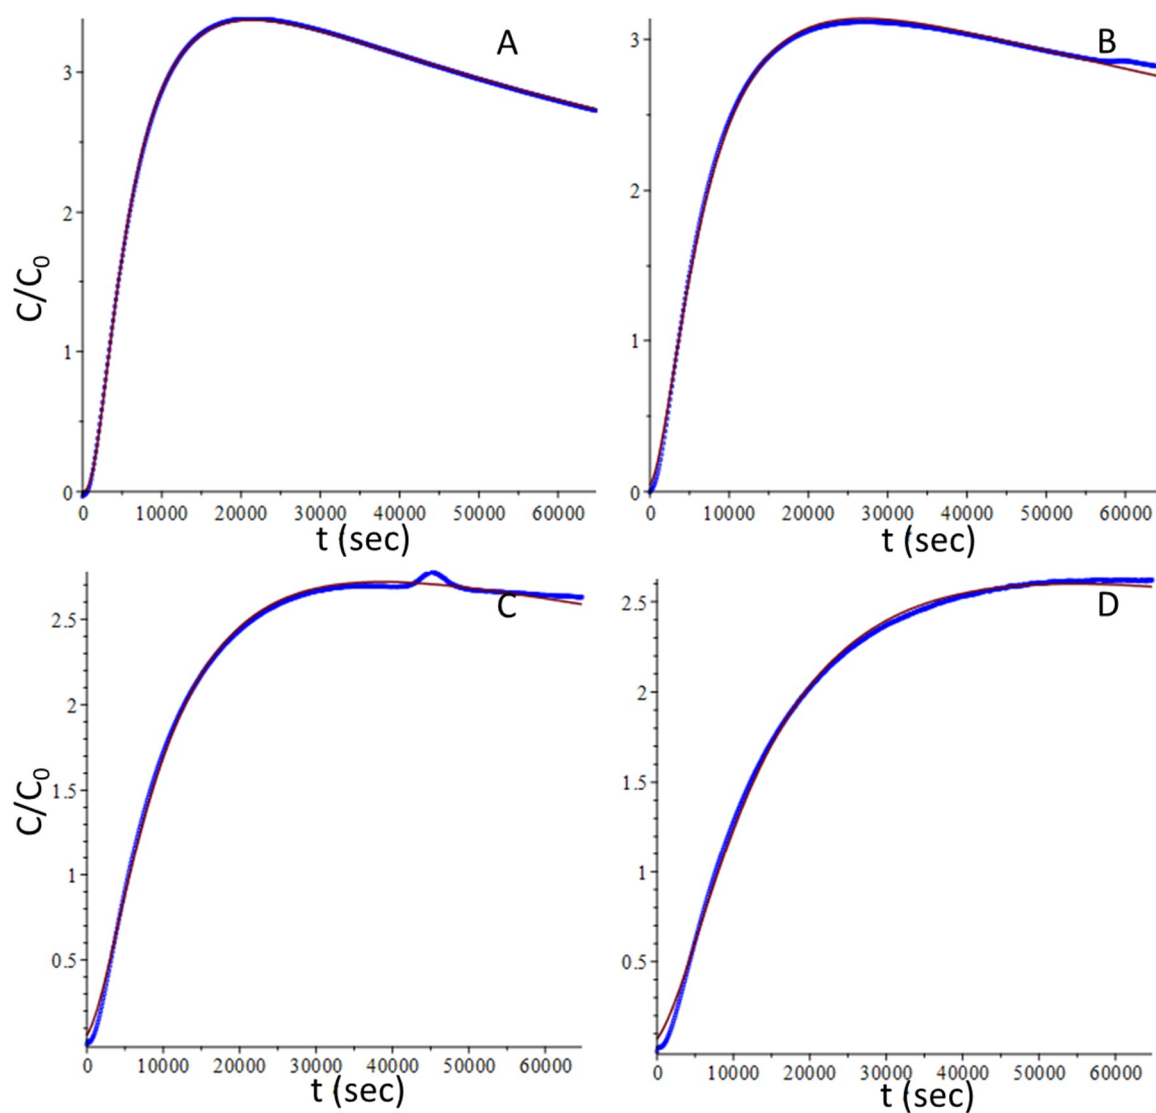

**Figure S2.** Diffusion profiles of atenolol (ATN) in water (A), MUC 0.1 (B), 0.3 (C) and 0.6% (D) (w/w). In this figure the drug concentration (C) has been normalized over the nominal concentration of the drug in the cuvette at the beginning of the experiment ( $C_0$ ).

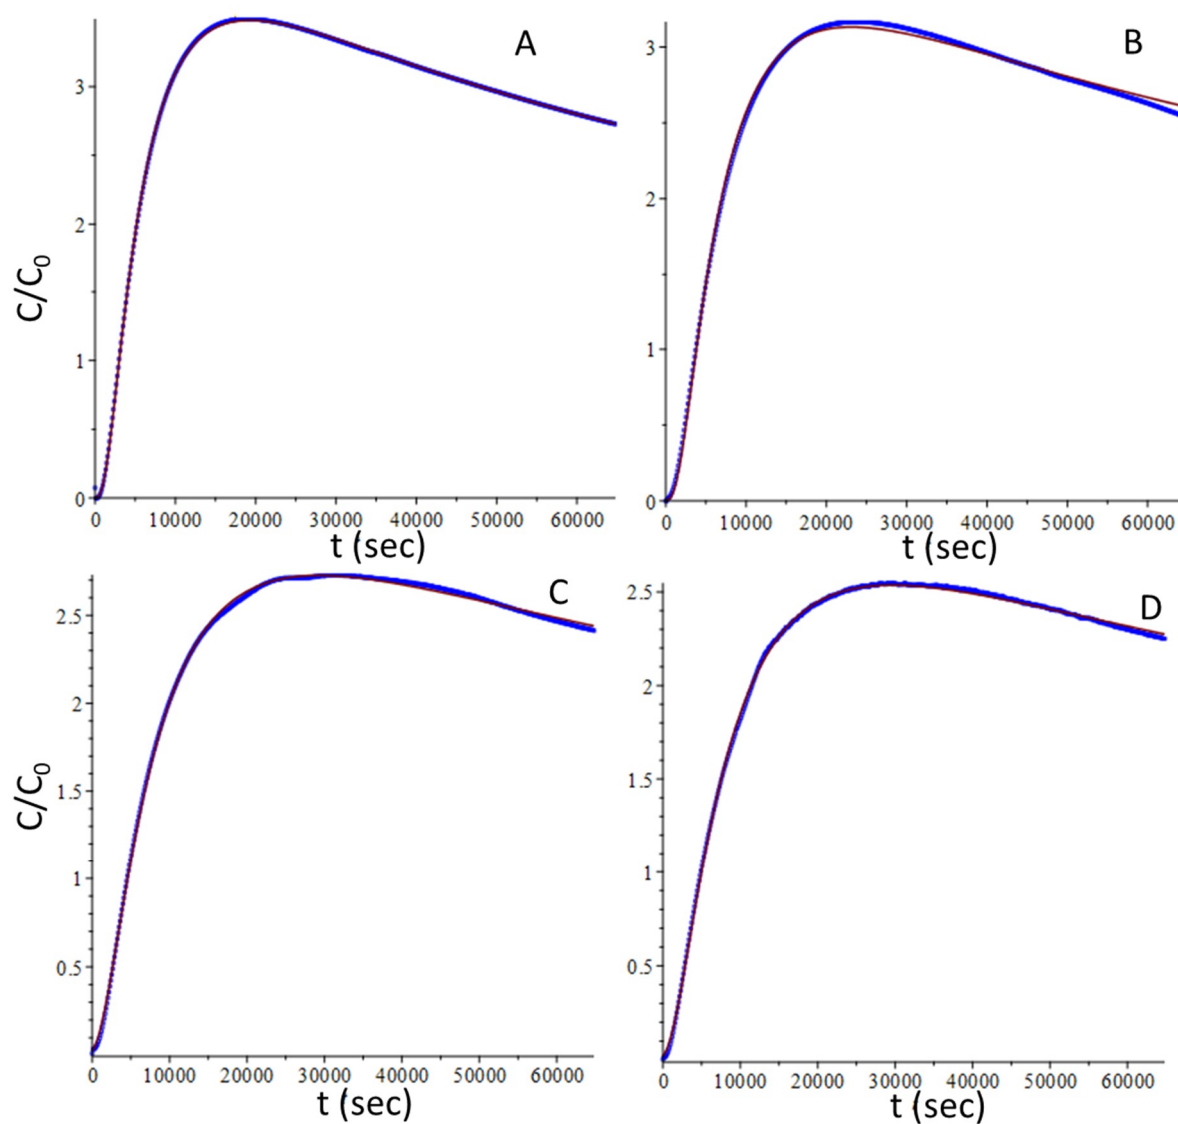

**Figure S3.** Diffusion profiles of hydrocortisone (HYD) in water (A), MUC 0.1 (B), 0.3 (C) and 0.6% (D) (w/w). In this figure the drug concentration (C) has been normalized over the nominal concentration of the drug in the cuvette at the beginning of the experiment ( $C_0$ ).
